# Supplementary material
Source: publisher figshare collection journal article supplement (https://wiley.figshare.com/articles/dataset/_/3569112)
Supplement: Supplementary file 1 [file 1]

Peter A. Abrams and Michael H. Cortez. 2015. The many potential indirect interactions between predators that share competing prey. *Ecological Monographs* VOL: pp-pp.

## Appendix A Overview of appendices and notation

The following appendices present all of our analytical results. Throughout we present results for the general case where  $b_{ji} \neq 1$ . While numerical differences arise between the  $b_{ji} = 1$  and  $b_{ji} \neq 1$  cases, most of the qualitative results presented in the main text for the  $b_{ji} = 1$  case hold for the  $b_{ji} \neq 1$  case. Any differences that do arise between the two cases are discussed in the appropriate sections.

Our notation is the following. We use the subscripts  $i$  and  $h$  for the prey species (e.g.,  $R_i$ ) and the subscripts  $j$  and  $k$  for the predator species (e.g.,  $N_j$ ). We frequently refer to the quantities  $\Delta = c_{12}c_{21} - c_{11}c_{22}$  and  $\bar{\Delta} = b_{12}c_{12}b_{21}c_{21} - b_{11}c_{11}b_{22}c_{22}$ . The value of  $\Delta$  has different implications for traditional and defense-based partitioning. As noted in the main text, for the defense-based partitioning cases the sign of  $\Delta$  determines which predator's attack rates are more sensitive to prey defense.  $\Delta > 0$  means  $N_1$  is more sensitive to prey defense and  $\Delta < 0$  means  $N_2$  is more sensitive to prey defense. Under defense-based partitioning, the sign of  $\bar{\Delta}$  has a similar interpretation for the composition of the predator attack rates and prey conversion rates. It is always the case that under traditional resource partitioning  $\Delta < 0$  and if the two predators coexist,  $\bar{\Delta} < 0$ .

Throughout, we only focus on the case where  $\Delta$  and  $\bar{\Delta}$  have the same sign because stable or cyclic coexistence of all four species is not possible when  $\Delta$  and  $\bar{\Delta}$  have opposite signs; see appendix B.3. Biologically, we expect  $\Delta$  and  $\bar{\Delta}$  to have the same sign in a number of cases including when (i) the conversion rate is constant across species,  $b_{ji} = c$  for all  $i, j$  or (ii) the relative conversion rates are determined by characteristics of the prey species,  $b_{11}/b_{12} = b_{21}/b_{22}$ .
